# Supplementary material for: T Cell Energy Metabolism Is a Target of Glucocorticoids in Mice, Healthy Humans, and MS Patients
Source: MDPI journal article supplement (doi:10.3390/cells12030450), 2023-01-30
Supplement: s1 [file s1]

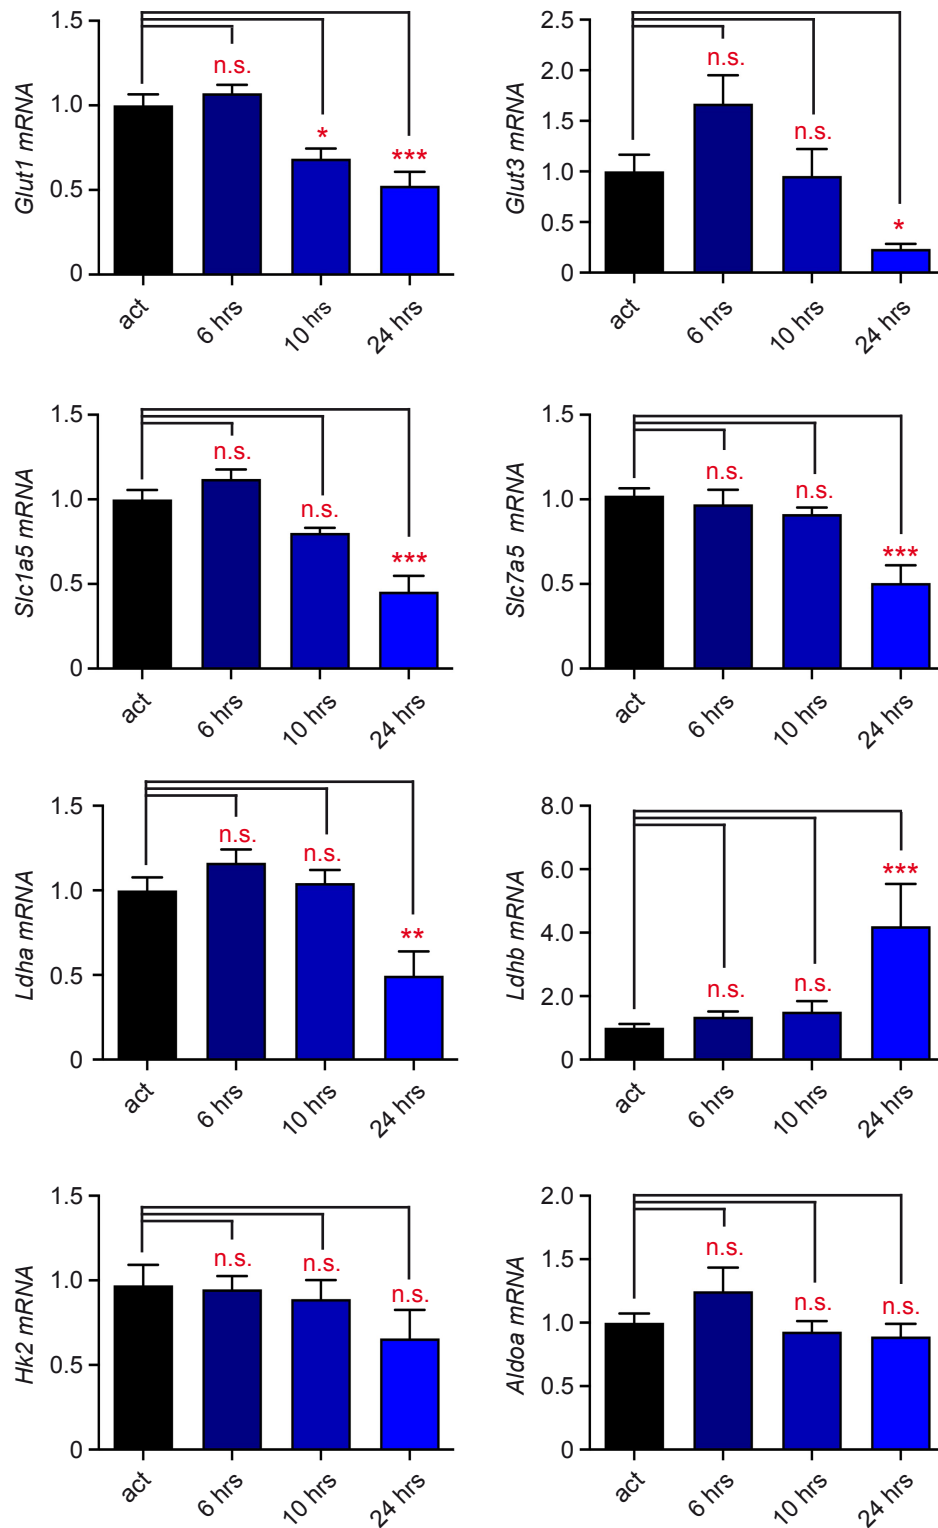

**Supplementary Figure S1.** Kinetics of metabolic gene expression in murine T cells after Dex treatment *in vitro*. T cells were purified from spleen and lymph nodes of C57BL/6 mice and stimulated with mCD3 $\epsilon$  and mCD28 antibodies for 24 hrs (act). To some samples,  $10^{-6}$  M Dex was added during the last 6, 10 or 24 hrs of incubation. Gene expression was determined by RT-qPCR. N=7-30. Relative mRNA levels were calculated by normalization to the housekeeping gene *Hprt*. Expression in activated T cells was arbitrarily set to 1. Values are depicted as the mean  $\pm$  SEM, statistical analysis was done by One-way ANOVA followed by a Multiple Comparisons test. Levels of significance: \*:  $p < 0.05$ ; \*\*:  $p < 0.01$ ; \*\*\*:  $p < 0.001$ ; n.s.:  $p > 0.05$ .

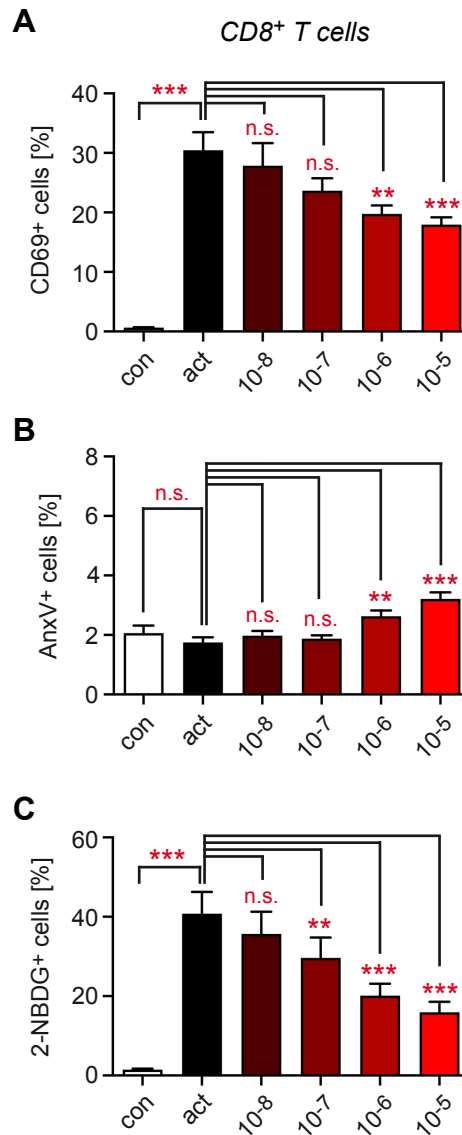

**Supplementary Figure S2.** Repression of T cell activation, apoptosis and glucose import in human peripheral blood CD8<sup>+</sup> T cells by Dex *in vitro*. T cells were purified from buffy coats of healthy human donors and stimulated using hCD3 $\epsilon$  and hCD28 antibodies for 20 hrs in the absence (act) or presence of 10<sup>-8</sup> to 10<sup>-5</sup> M Dex. Unstimulated T cells served as a control (con). The percentages of **(A)** CD69<sup>+</sup> and **(B)** AnxV<sup>+</sup> CD3<sup>+</sup>CD8<sup>+</sup> T cells were determined by flow cytometric analysis; N=17/12. **(C)** Glucose import was determined by incubating the cells for 1 hr with fluorescently labelled 2-NBDG and then measuring the percentage of CD3<sup>+</sup>CD8<sup>+</sup> T cells positively stained for 2-NBDG by flow cytometry; N=15. All values are depicted as the mean  $\pm$  SEM. Statistical analysis was performed by One-way ANOVA followed by a Multiple Comparisons test. Levels of significance: \*:  $p < 0.05$ ; \*\*:  $p < 0.01$ ; \*\*\*:  $p < 0.001$ ; n.s.:  $p > 0.05$ .

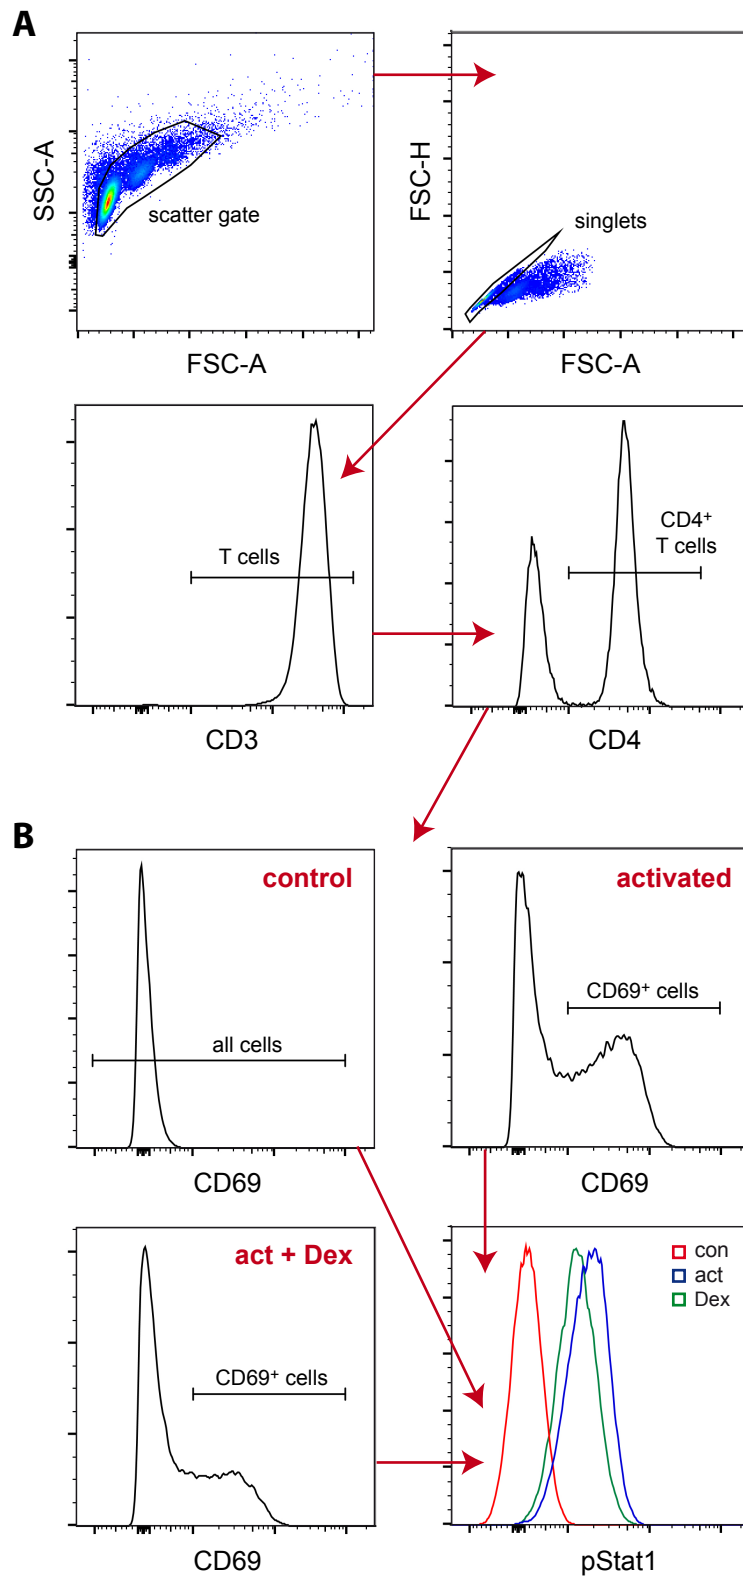

**Supplementary Figure S3.** Exemplary flow cytometric analysis of *in vitro* cultured human peripheral blood T cells for Stat1 activation. **(A)** Relevant cells were first defined on the basis of their forward and sideward scatter, followed by gating on singlets. CD4<sup>+</sup> T cells were then identified using antibodies recognizing CD3 and CD4. **(B)** CD69 was used as a marker to characterize activated T cells after costimulation for 20 hrs in the absence (act) or presence of 10<sup>-5</sup> M Dex or being left untreated (con). pStat1 levels are depicted as overlay histograms either gated on all cells (con) or CD69<sup>+</sup> cells (act/Dex).

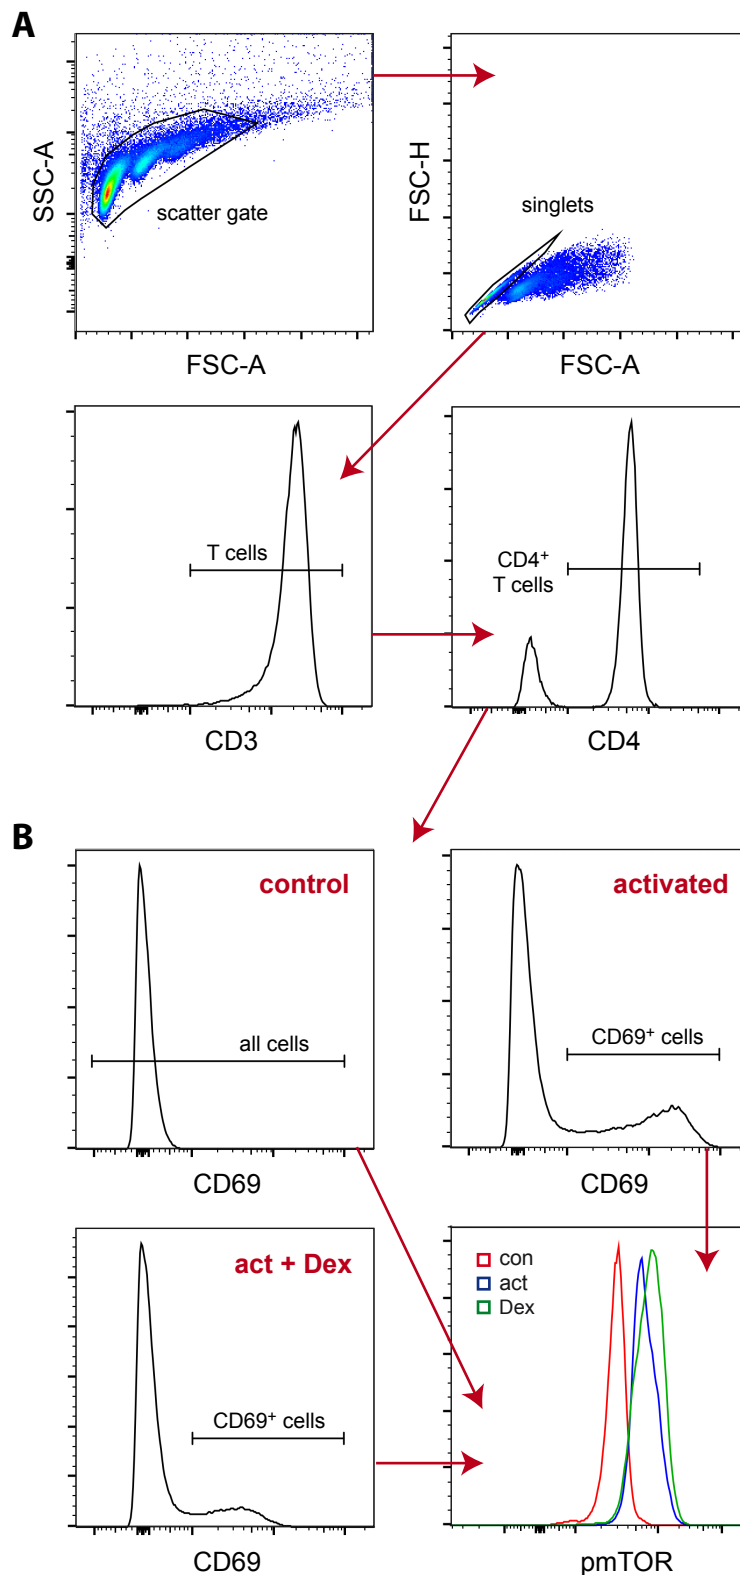

**Supplementary Figure S4.** Exemplary flow cytometric analysis of *in vitro* cultured human peripheral blood T cells for mTOR activation. **(A)** Relevant cells were first defined on the basis of their forward and sideward scatter, followed by gating on singlets. CD4<sup>+</sup> T cells were then identified using antibodies recognizing CD3 and CD4. **(B)** CD69 was used as a marker to characterize activated T cells after costimulation for 20 hrs in the absence (act) or presence of 10<sup>-5</sup> M Dex or being left untreated (con). pmTOR levels are depicted as overlay histograms either gated on all cells (con) or CD69<sup>+</sup> cells (act/Dex).

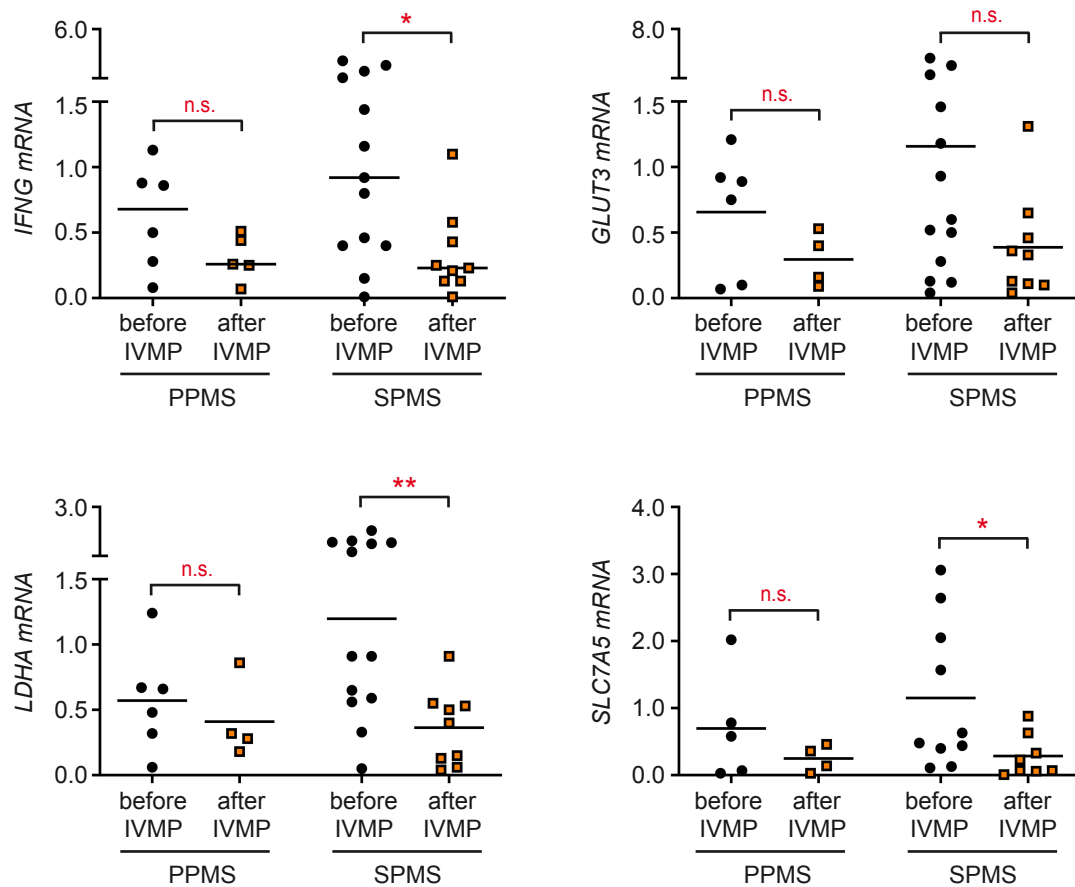

**Supplementary Figure S5.** Comparison of metabolic gene expression in human peripheral blood T cells from MS patients before and after IVMP therapy. T cells were purified from blood samples collected either from PPMS or SPMS patients immediately before IVMP therapy and 24 hrs later. Gene expression was determined by RT-qPCR and relative mRNA levels were calculated by normalization to the housekeeping gene 18SRNA. N=4-6 (PPMS), N=8-13 (SPMS). Each dot corresponds to one patient. The data are identical to Figure 8C except that they are separately depicted for each disease subtype. Statistical analysis was performed by unpaired t-test. Levels of significance: \*:  $p < 0.05$ ; \*\*:  $p < 0.01$ ; n.s.:  $p > 0.05$ .

**Supplementary Table S1. Primer sequences**

| Gene           | Forward primer                       | Reverse primer                          |
|----------------|--------------------------------------|-----------------------------------------|
| <i>mAldoa</i>  | 5'-CAG ATG GGT CCA GCT TCA AC-3'     | 5'-TGC TTT CCT TTC CTA ACT CTG TC-3'    |
| <i>mGlut1</i>  | 5'-AGC ATC TTC GAG AAG GCA GG-3'     | 5'-ACA ACA AAC AGC GAC ACC AC-3'        |
| <i>mGlut3</i>  | 5'-CTC TTC AGG TCA CCC AAC TAC GT-3' | 5'-CCG CGT CCT TGA AGA TTC C-3'         |
| <i>mHk2</i>    | 5'-GCC TCG GTT TCT CTA TTT GGC-3'    | 5'-ATA CTG GTC AAC CTT CTG CACT-3'      |
| <i>mHprt</i>   | 5'-GTC CTG TGG CCA TCT GCC TA-3'     | 5'-GGG ACG CAG CAA CTG ACA TT-3'        |
| <i>mLdha</i>   | 5'-AGT AAG TCC TCA GGC GGC TA-3'     | 5'-GGA CTT TGA ATC TTT TGA GAC CTT G-3' |
| <i>mLdhb</i>   | 5'-AAA GGC TAC ACC AAC TGG GC-3'     | 5'-GCC GTA CAT TCC CTT CAC CA-3'        |
| <i>mSlc1a5</i> | 5'-CGC TAT CGT CTT TGG TGT GG-3'     | 5'-GGG TGC GTA CCA CAT AAT CC-3'        |
| <i>mSlc7a5</i> | 5'-GGG GAA GGA CATG GGA CAAG-3'      | 5'-ATA GTT CCAT CCT CCG TAG GCG-3'      |
| <i>h18SRNA</i> | 5'-TCC AGG TCT TCA CGG AGC TTG TT-3' | 5'-GGA TGT AAA GGA TGG AAA ATACA-3'     |
| <i>hALDOA</i>  | 5'-TGT CCA TGG CTA TGG CCT TTT-3'    | 5'-TGG TAG TAG CAA GTT CCT TTC CTA-3'   |
| <i>hGLUT1</i>  | 5'-TGG CAT CAA CGC TGT CTT CT-3'     | 5'-AGC CAA TGG TGG CAT ACA CA-3'        |
| <i>hGLUT3</i>  | 5'-GGA CGT GGA GAA AAC TTG CTG-3'    | 5'-TCA GAG CTG GGG TGA CCT TC-3'        |
| <i>hHK2</i>    | 5'-CCT CCC CTC TCG CGT CT-3'         | 5'-AGA GAT ACT GGT CAA CCT TCT GC-3'    |
| <i>hIL2</i>    | 5'-TTT ACA TCG CCA AGA AGG CCA-3'    | 5'-GCA CTT CCT CCA GAG GTT TG-3'        |
| <i>hIFNG</i>   | 5'-CTG TAA CTG CCA GGA CCC AT-3'     | 5'-TCT GTC ACT CTC CTC TTT CCA-3'       |
| <i>hLDHA</i>   | 5'-ACG TGC ATT CCC GAT TCC TT-3'     | 5'-AAC AGC ACC AAC CCC AAC AA-3'        |
| <i>hLDHB</i>   | 5'-GCC TTC TCT CTC CTG TGC AA-3'     | 5'-CCT CTT CTT CCG CAA CTG GT-3'        |
| <i>hSLC1A5</i> | 5'-AGT GGG CTT GGC GCT G-3'          | 5'-TGG AAG GGA AGA TAT TTC TCG CA-3'    |
| <i>hSLC7A5</i> | 5'-TCA TCG CAG TAC ATC GTG GC-3'     | 5'-TGA GCA GCA GCA CGC AG-3'            |

**Supplementary Table S2. Patient characteristics**

|                                     | PPMS        | SPMS        | total       |
|-------------------------------------|-------------|-------------|-------------|
| Number of patients                  | 12          | 17          | 29          |
| Age (years, $\pm$ SD)               | 60.5 (12.5) | 65.8 (10.1) | 63.6 (11.5) |
| Females (number, %)                 | 6 (50)      | 10 (58.8)   | 16 (55.2)   |
| EDSS Score (mean $\pm$ SD)          | 5.0 (1.2)   | 6.1 (1.1)   | 5.7 (1.2)   |
| $\Delta$ EDSS Score (mean $\pm$ SD) | 0.21 (0.76) | 0.17 (0.96) | 0.18 (0.87) |
| Disease duration (years, $\pm$ SD)  | 10.9 (9.4)  | 27.5 (13.3) | 21.7 (14.5) |
| IVMP therapy (years $\pm$ SD)       | 3.3 (3.4)   | 3.5 (4.2)   | 3.4 (3.9)   |
